# Supplementary material for: Alternate expression of CONSTANS-LIKE 4 in short days and CONSTANS in long days facilitates day-neutral response in Rosa chinensis
Source: PubMed Central journal article supplement (PMC7475255; doi:10.1093/jxb/eraa161), 2020-03-28
Supplement: eraa161_suppl_supplementary_figures_s1-s5_table_s1.pdf [file eraa161_suppl_supplementary_figures_s1-s5_table_s1.pdf]

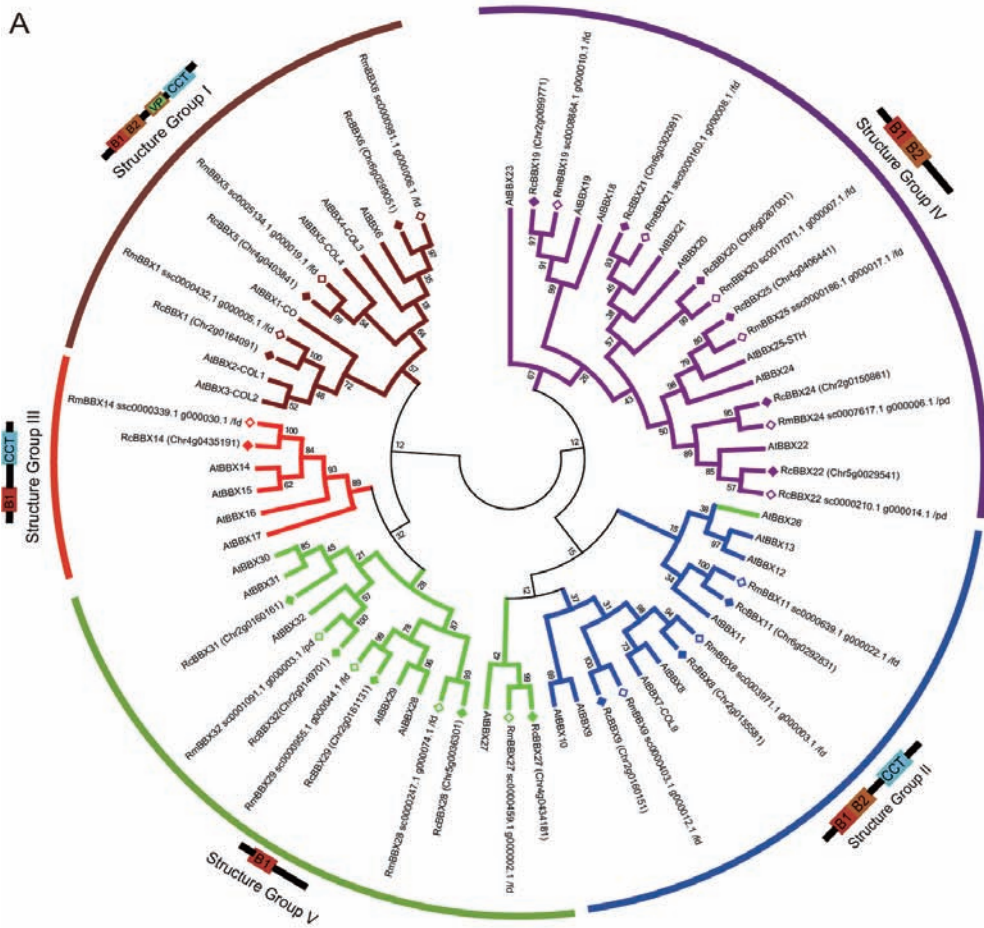

**B**

| Species                     | All | Group I | Group II | Group III | Group IV | Group V | Chromosome |
|-----------------------------|-----|---------|----------|-----------|----------|---------|------------|
| <i>Arabidopsis thaliana</i> | 32  | 6       | 7        | 4         | 8        | 7       | 2n=10      |
| <i>Rosa chinensis</i>       | 18  | 3       | 3        | 1         | 6        | 5       | 2n=14      |
| <i>Rosa multiflora</i>      | 17  | 3       | 3        | 1         | 6        | 4       | 2n=14      |

**Figure S1. Identification of *RcBBX* family genes in *Rosa chinensis***

(A) Phylogenetic analysis of BBX family genes among *Arabidopsis thaliana*, *Rosa multiflora* and *Rosa chinensis*. Bootstrap values indicate the divergence of each branch. Different groups are classified and shown by different color.

(B) Numbers of BBX family genes among *Arabidopsis thaliana*, *Rosa multiflora* and *Rosa chinensis*.

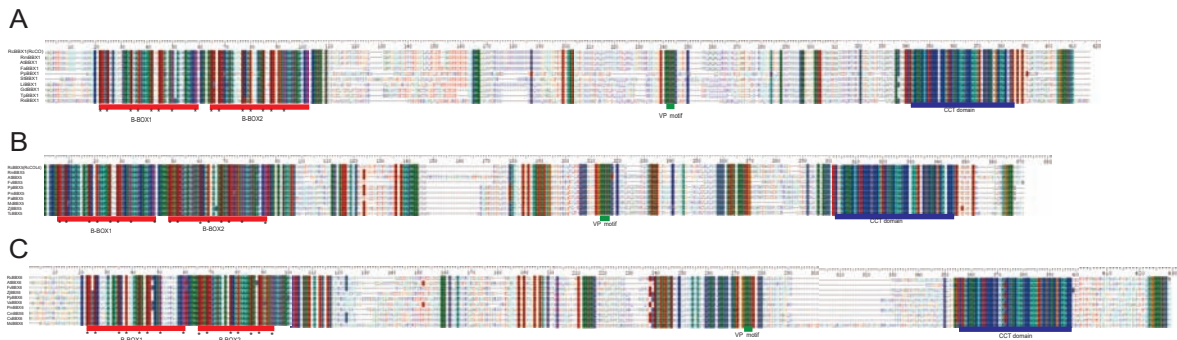

**Figure S2. Amino acid sequence comparison of *CO*, *COL4* and *COL5* across different species**

Alignment of amino acid sequences of *RcCO* (A), *RcCOL4* (B) and *RcCOL5* (C) with the counterparts from *Rosa chinensis* (Rc), *Rosa multiflora* (Rm), *Arabidopsis thaliana* (At), *Fragaria × ananassa* (Fa), *Prunus persica* (Pp), *Solanum tuberosum* (St), *Lagerstroemia indica* (Li), *Gossypium darwinii* (Gd), *Thespesia populneoides* (Tp), *Raphanus sativus* (Rs), *Fragaria vesca* (Fv), *Prunus avium* (Pa), *Ziziphus jujube* (Zj), *Theobroma cacao* (Tc), *Vigna angularis* (Va), *Prunus mume* (Pm), *Cucumis sativus* (Cs), *Cucumis melo* (Cm), *Malus domestica* (Md). Red lines indicate two B-box domains, green lines indicate VP motif and blue lines indicate CCT domain. The asterisks below the red lines indicate the Zn<sup>2+</sup>-ligating conserved Cys, His and Asp residues presented in the B-box.

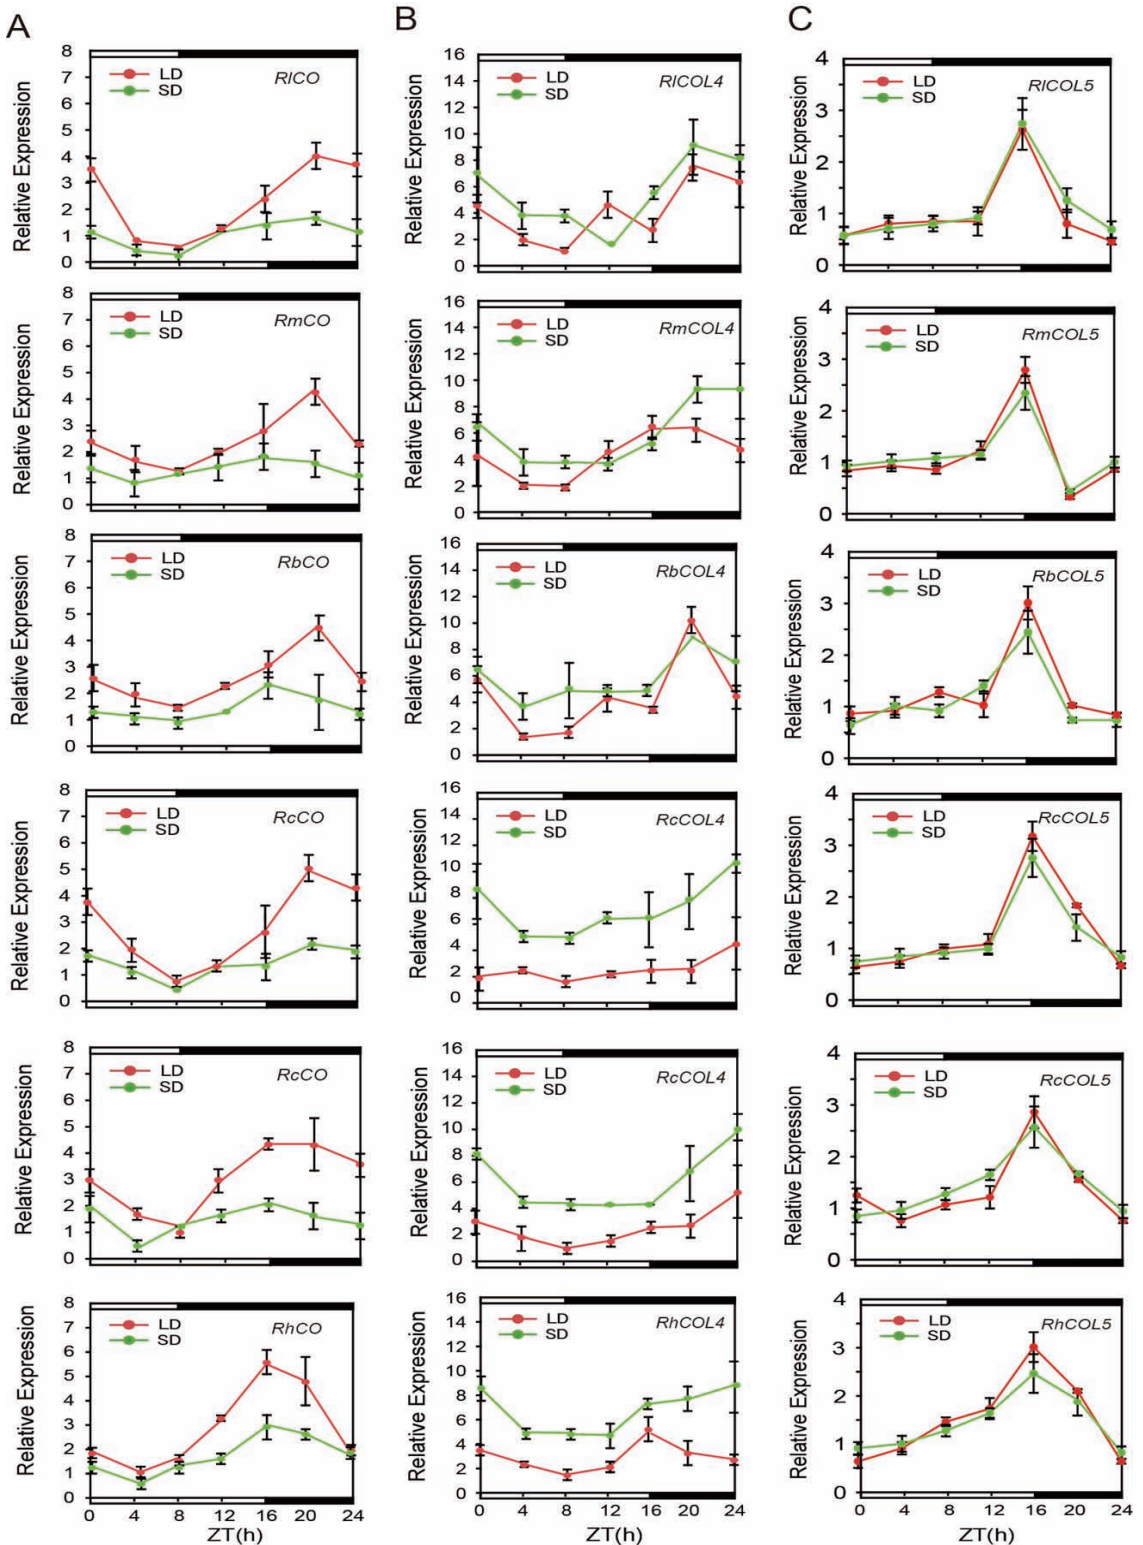

**Figure S3. Expression level of *CO*, *COL4* and *COL5* in three OF and three CF roses under LD and SD condition.**

**(A)** Relative expression of *CO* in three OF roses (*Rosa laevigata*, *Rosa multiflora* and *Rosa berberifolia*) and three CF roses (*Rosa chinensis* cv 'Sichun', *Rosa chinensis* cv 'Viridiflora' and *Rosa hybrida* cv 'Molde').

**(B)** Relative expression of *COL4* in three OF roses (*Rosa laevigata*, *Rosa multiflora* and *Rosa berberifolia*) and three CF roses (*Rosa chinensis* cv 'Sichun', *Rosa chinensis* cv 'Viridiflora' and *Rosa hybrida* cv 'Molde').

**(C)** Relative expression of *COL5* in three OF roses (*Rosa laevigata*, *Rosa multiflora* and *Rosa berberifolia*) and three CF roses (*Rosa chinensis* cv 'Sichun', *Rosa chinensis* cv 'Viridiflora' and *Rosa hybrida* cv 'Molde').

The bar above and below the graphs indicates the light conditions, with day and night denoted in white and black, respectively.

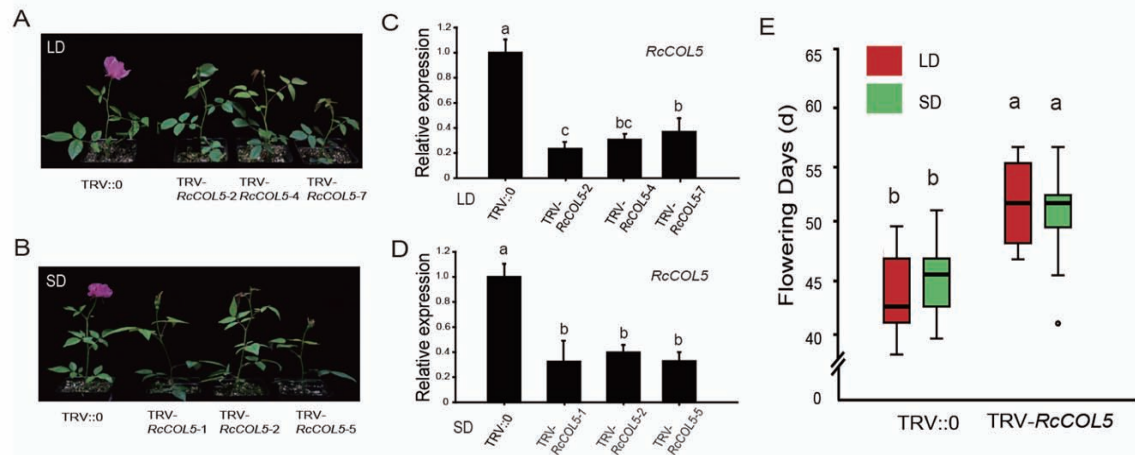

**Figure S4. Flowering phenotype and gene expression levels of *RcCOL5*-silenced plants under LD and SD**

(A), (B) Phenotypic characterization of TRV-*RcCOL5* plants under long day LD (A) and SD (B) conditions (Plants were photographed 44 days after transplanting).

(C), (D) Relative expression of *RcCOL5* in silenced plants under long day LD (C) and SD (D) conditions. Error bars indicate  $\pm$ SD (n=10). Letters above the bars denote significant differences ( $P < 0.05$ ).

(E) Flowering time of *RcCOL5*-silenced plants under LD and SD conditions. Error bars indicate  $\pm$ SD (n=10). Letters above the bars denote significant differences as determined Kruskal Wallis test ( $P < 0.05$ ).

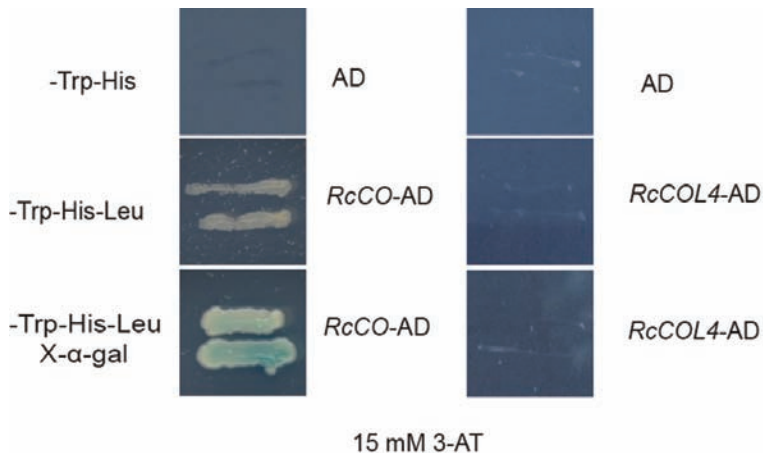

**Figure S5. *RcCO* not *RcCOL4* binds to the promoter of *pRcFT* in yeast one hybrid.**

Yeast Y187 cells containing pGADT7-*RcCO*/pGADT7-*RcCOL4* and pHis2-*pFT* were incubated, and the binding activities were examined on SD medium lacking Tryptophan, Leucine and Histidine (SD/-Trp/-Leu/-His) with the proper concentration of 3-amino-1, 2, 4-triazole (15mM) to inhibit self-activation.

**Table S1. The primers used in this study.**

| Primer ID       | Sequence of primers (5'-3')                       | Purpose                                    |
|-----------------|---------------------------------------------------|--------------------------------------------|
| ReCO-F          | caccATGTTGAAAGAAGAGAGCAATG                        | Gene cloning to D-TOPO                     |
| ReCO-R          | GTATGAAGGAACAATGCCGTATC                           |                                            |
| ReCOL4-F        | caccATGTTTCTACTCGGGGCAATC                         | Gene cloning to D-TOPO                     |
| ReCOL4-R        | AAAAGAGGGAACGACGCCGTAGC                           |                                            |
| pReFT-F         | caccATATCAGTTCTTTCATGGCAATCAG                     | Promoter cloning to D-TOPO                 |
| pReFT-R         | TAACTAATTTTACACAGGCCACCT                          |                                            |
| ReCO-F-EcoR I   | GGAATTCATGTTGAAAGAAGAGAGCA                        | For yeast one/two hybrid                   |
| ReCO-R-Xho I    | CCTCGAGGTATGAAGGAACAATGCCGTAT                     |                                            |
| ReCOL4-F-Nde I  | CCATATGATGTTTCTACTCGGGGCAATC                      | For yeast one/two hybrid                   |
| ReCOL4-R-Sal I  | GGTCGACAAAAGAGGGAACGACGCC                         |                                            |
| pFT-pHis-F      | GGAATTCATATCAGTTCTTTCATGGCAATCAG                  | For yeast one hybrid                       |
| pFT-pHis-R      | GGAGCTCTAACTAATTTTACACAGGCCACCT                   |                                            |
| ReCO-F-BamH I   | GGAATTCATGTTGAAAGAAGAGAGCA                        | Vectors for in vitro expression of protein |
| ReCO-R-Xho I    | CCTCGAGGTATGAAGGAACAATGCCGTAT                     |                                            |
| ReCOL4-F-BamH I | GGAATTCATGTTTCTACTCGGGGCAATC                      | Vectors for in vitro expression of protein |
| ReCOL4-R-Xho I  | CCTCGAGAAAAGAGGGAACGACGCCGTAGC                    |                                            |
| NF-YB-F-BamH I  | GGAATTCATGGCCGACTCGGACAACGACTC                    | Vectors for in vitro expression of protein |
| NF-YB-R-Xho I   | CCTCGAGCCTTGACCTCACTGAAGCT                        |                                            |
| NF-YC-F-BamH I  | GGAATTCATGGATCAGCAAGGACATGGGCA                    | Vectors for in vitro expression of protein |
| NF-YC-R-Xho I   | CCTCGAGATGATCAGATGGTGACTGTTGCTG                   |                                            |
| ReCOL4-mu1-F    | CTTCTCTCCGTAAGTGGCAGACAAAGATCCACGC                | For mutation of Cys-18                     |
| ReCOL4-mu1-R    | CAGTTACGGAGAGGAAAGCGGAGTCTGCTCGGCA                |                                            |
| ReCOL4-mu2-F    | CGACTCTGTCTCCCGAGCAGACTCCGCTTTCCTCT               | For mutation of Cys-26                     |
| ReCOL4-mu2-R    | TGCTCGGGAGAACAGAGTCGCCGTGCGCGATTGCA               |                                            |
| ReCOL4-mu3-F    | ACCCTCTCCGTCACGTGCGACCGAGAAATCCACTCT              | For mutation of Cys-61                     |
| ReCOL4-mu3-R    | CACGTGACGGAGAGGGTGGCGTCTGCGCCCTTGCA               |                                            |
| ReCOL4-mu4-F    | ACGTCACGTCCAAGGCCGACGACGCCACCCTCT                 | For mutation of Cys-69                     |
| ReCOL4-mu4-R    | GGCCTTGACGTGACGTGGGCGGGAGCCTGCT                   |                                            |
| ReCO-VIGS-F     | TGAATCCGGTGAAGAACAGCAAC                           | VIGS vector construction                   |
| ReCO-VIGS-R     | ACCTTCTCCATACTGAACTGGTAC                          |                                            |
| ReCOL4-VIGS-F   | GTTTCTACTCGGGGCAATC                               | VIGS vector construction                   |
| ReCOL4-VIGS-R   | TTG AGT CGT CCG AGT TGA GTG AG                    |                                            |
| CORE-BOX(BJ)-F  | GTTTATCTTTGAACAAAAGATGAACCACAGAATGATCGATCAGCAGCAT | CORE motif probe                           |
| CORE-BOX(BJ)-R  | ATGCTGCTGATCGATCATTCTGTGGTTTCATCTTTGTTCAAAGATAAAC |                                            |
| CORE-BOX-F      | GTTTATCTTTGAACAAAAGATGAACCACAGAATGATCGATCAGCAGCAT | Competitor probe                           |
| CORE-BOX-R      | ATGCTGCTGATCGATCATTCTGTGGTTTCATCTTTGTTCAAAGATAAAC |                                            |
| ReGAPDH-F       | GCTGGCAGGTATCCTTTCTG                              | q-PCR                                      |
| ReGAPDH-R       | GGCGACAATATCAGCCAAAGT                             |                                            |
| ReCO-Q-F        | GATACCACCGAGGACGGGTT                              | q-PCR                                      |
| ReCO-Q-R        | CAGGACGCAGCCTCATTTTC                              |                                            |
| ReCOL4-Q-F      | GGCTTCGATCTCCGCTTCTG                              | q-PCR                                      |
| ReCOL4-Q-R      | TCAACTTCTCGACGACCGA                               |                                            |
| ReCOL5-Q-F1     | CGCCTCCCGAAAGCCTATG                               | q-PCR                                      |
| ReCOL5-Q-R1     | CCCGGCGCCGAGTTAAAGAT                              |                                            |
| ReFT-Q-F        | AGCTTGAGTGTGGGTCT                                 | q-PCR                                      |
| ReFT-Q-R        | ATTGGGAACCGCCAAAGAAA                              |                                            |
| Actin2-F        | GGTAACATTGTGCTCAGTGGTGG                           | RT-PCR                                     |
| Actin2-R        | AACGACCTTAATCTTCATGCTGC                           |                                            |
| ReCO-RT-F       | CTCCCCATCTCCGGCTTCTCTC                            | RT-PCR                                     |
| ReCO-RT-R       | TCCATCCCCAACTGATG                                 |                                            |
| ReCOL4-RT-F     | GTTCCTGCCGAGCAGACTCCGC                            | RT-PCR                                     |
| ReCOL4-RT-R     | AGATCCAAATACGGATCCA                               |                                            |
